# Supplementary material
Source: MDPI journal article supplement (https://www.mdpi.com/2297-8739/11/1/15)
Supplement: s1 [file s1]

# Supplementary material

|                                                       | page |
|-------------------------------------------------------|------|
| Figure S1. MS <sup>2</sup> 515 m/z [M-H] <sup>-</sup> | 2    |
| Figure S2. MS <sup>3</sup> [515 → 311] m/z            | 3    |
| Figure S3. <sup>1</sup> H-NMR spectrum of tenelloside | 4    |
| Figure S4. <sup>13</sup> C-NMR of tenelloside         | 4    |
| Figure S5. COSY of tenelloside                        | 5    |
| Figure S6. HSQC of tenelloside                        | 5    |
| Figure S7. HMBC of tenelloside (part 1)               | 6    |
| Figure S8. HMBC of tenelloside (part 2)               | 6    |
| Figure S9. ROESY of tenelloside                       | 7    |
| Figure S10. ROESY of tenelloside (zoom)               | 7    |

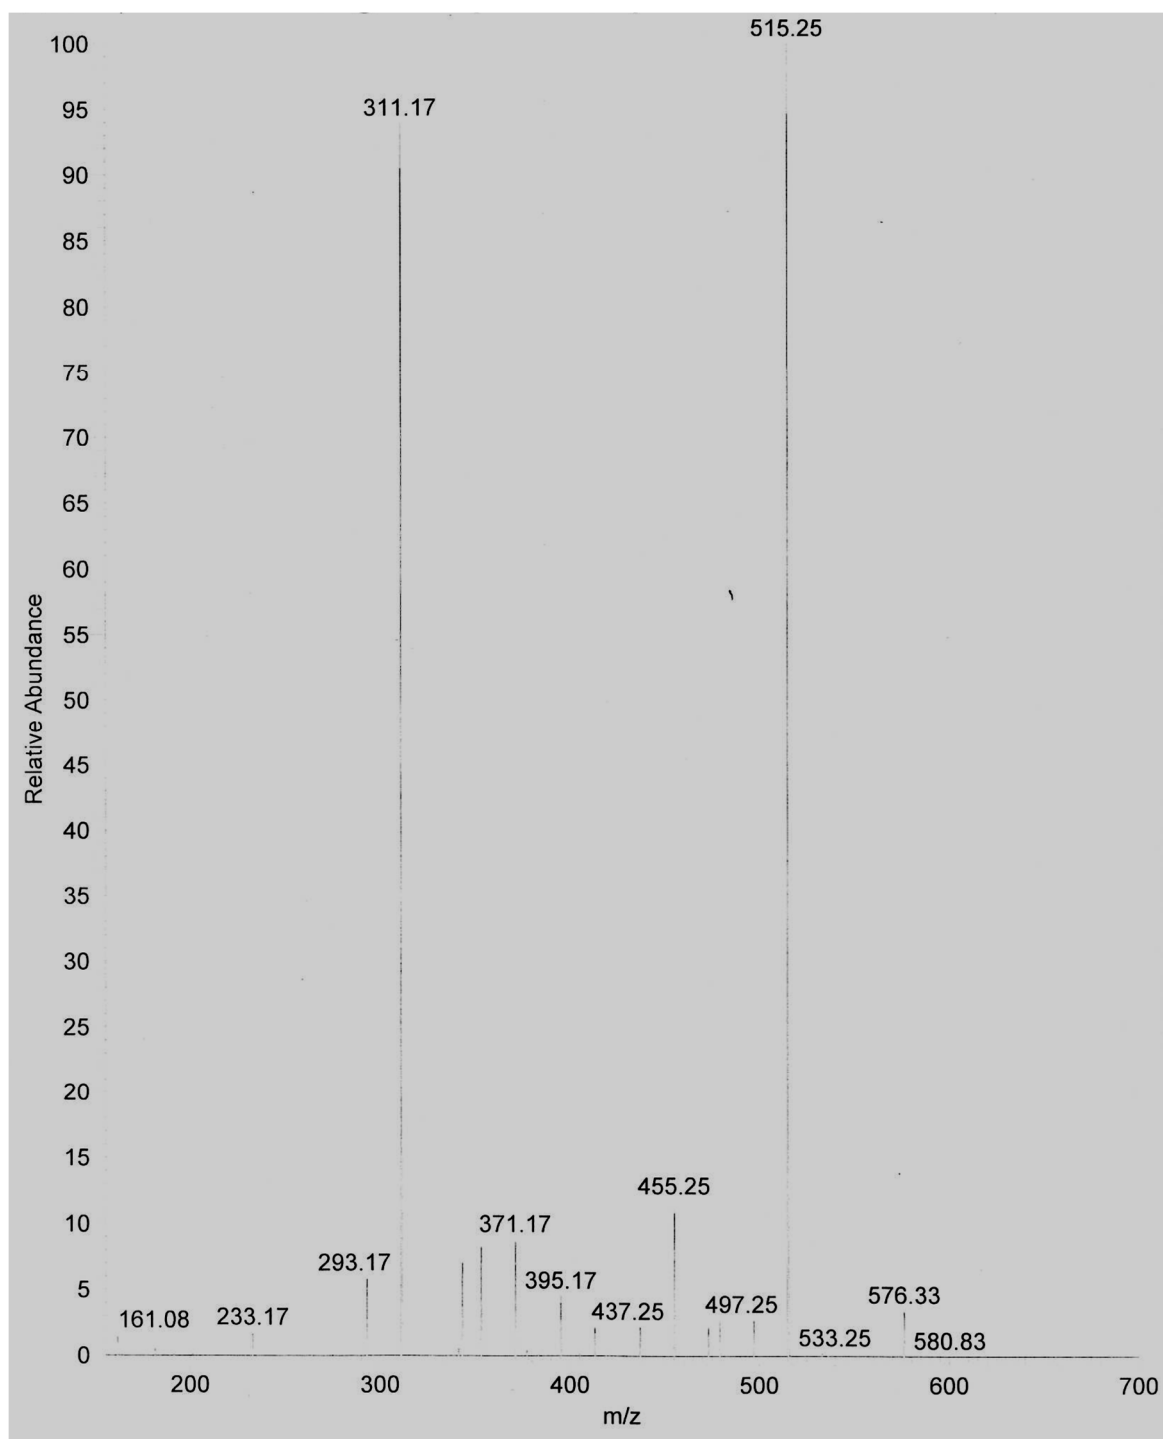

Figure S1. MS/MS fragmentation of 515 m/z pseudomolecular ion (negative mode)

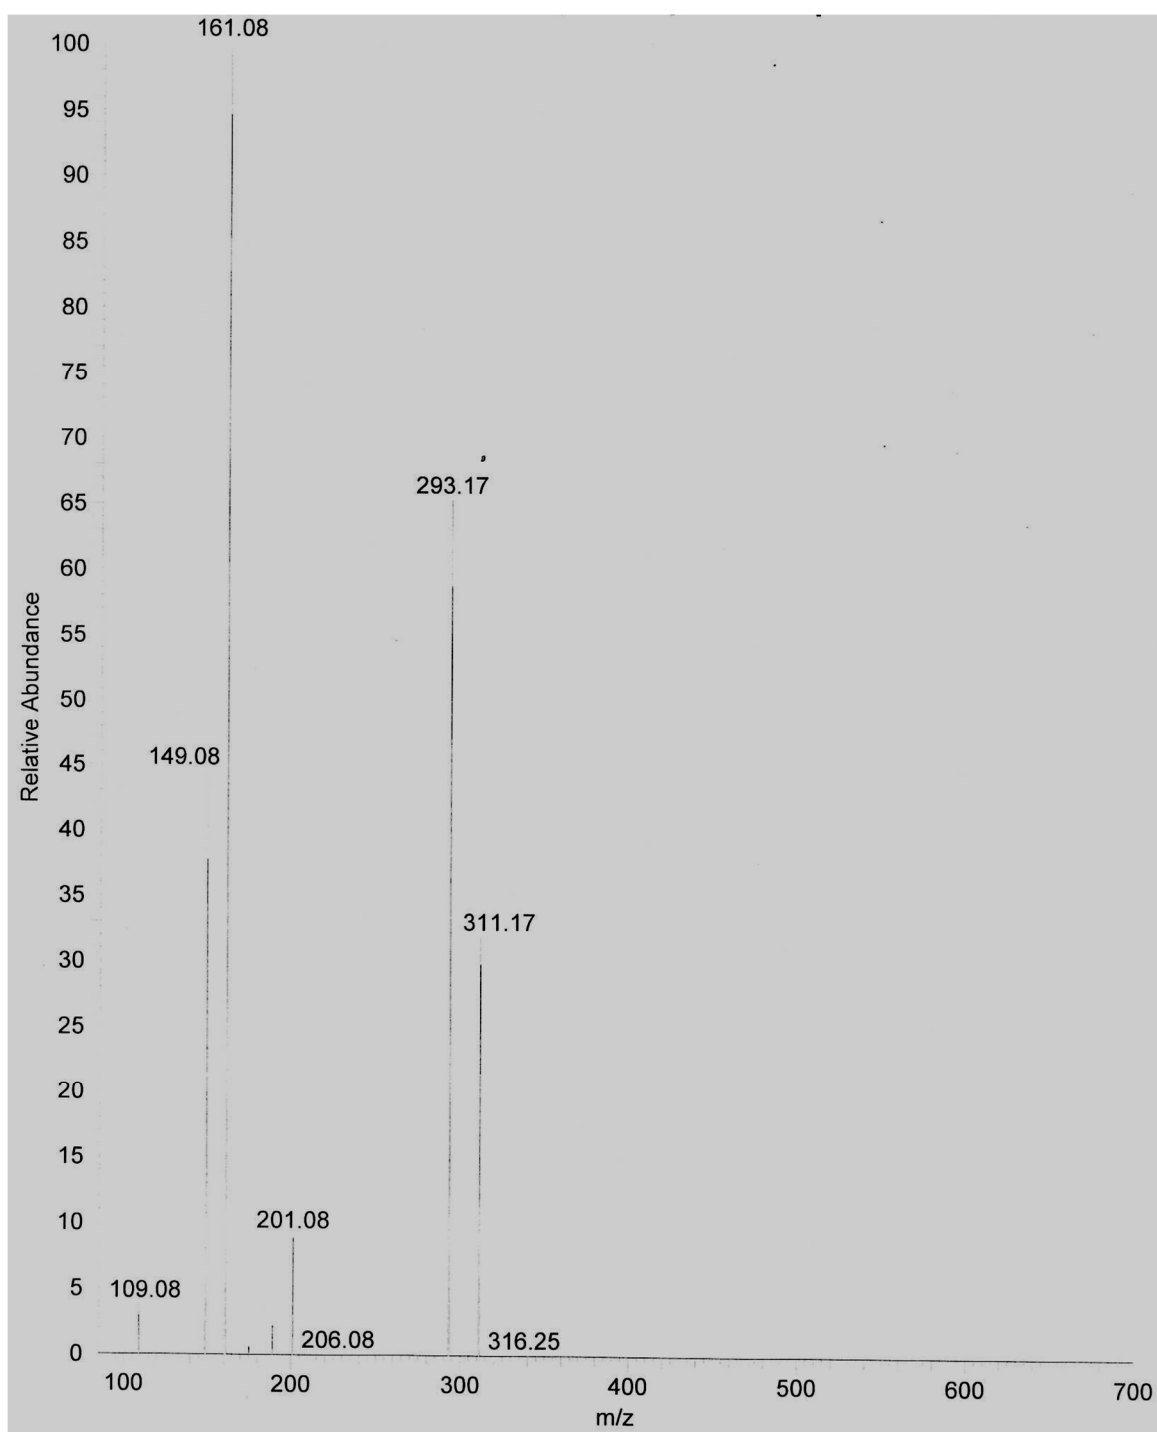

Figure S2. MS<sup>3</sup> [515 → 311] m/z

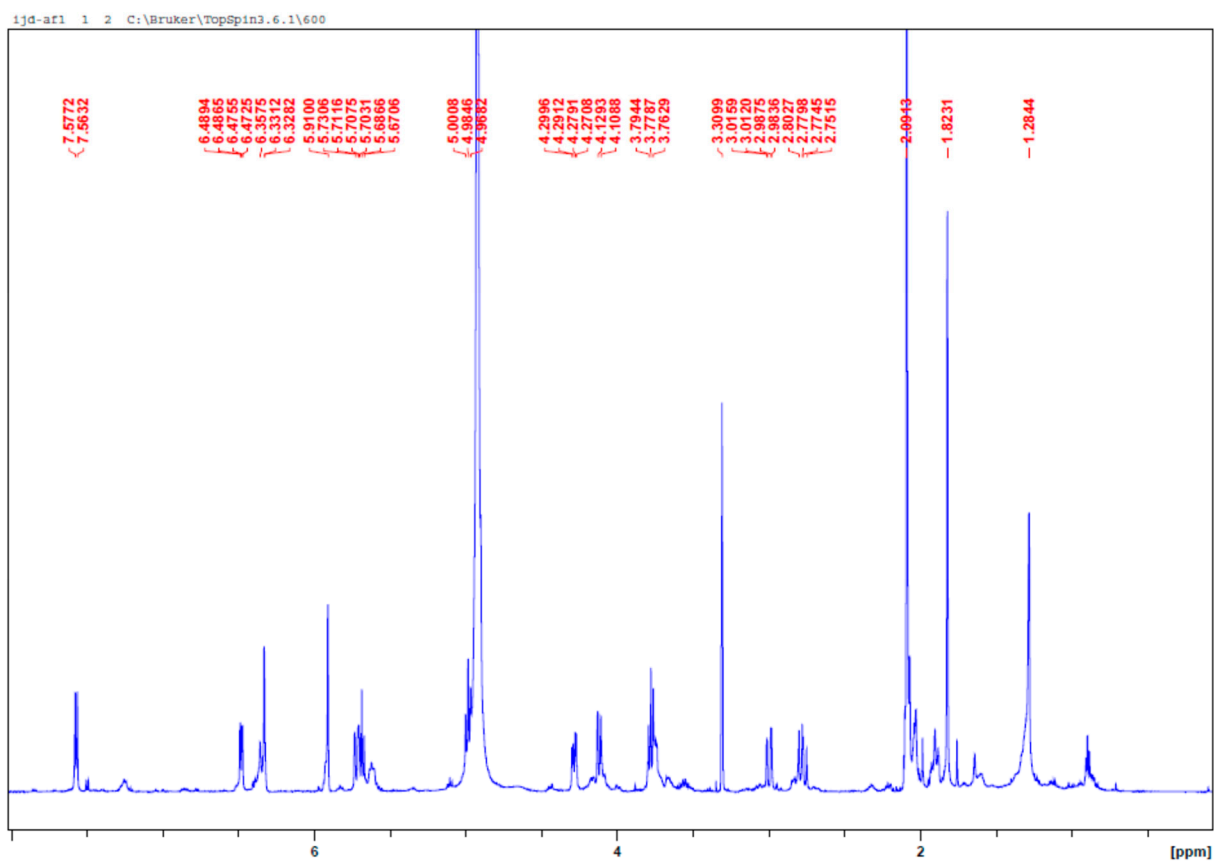

Figure S3.  $^1\text{H}$ -NMR spectrum of tenelloside

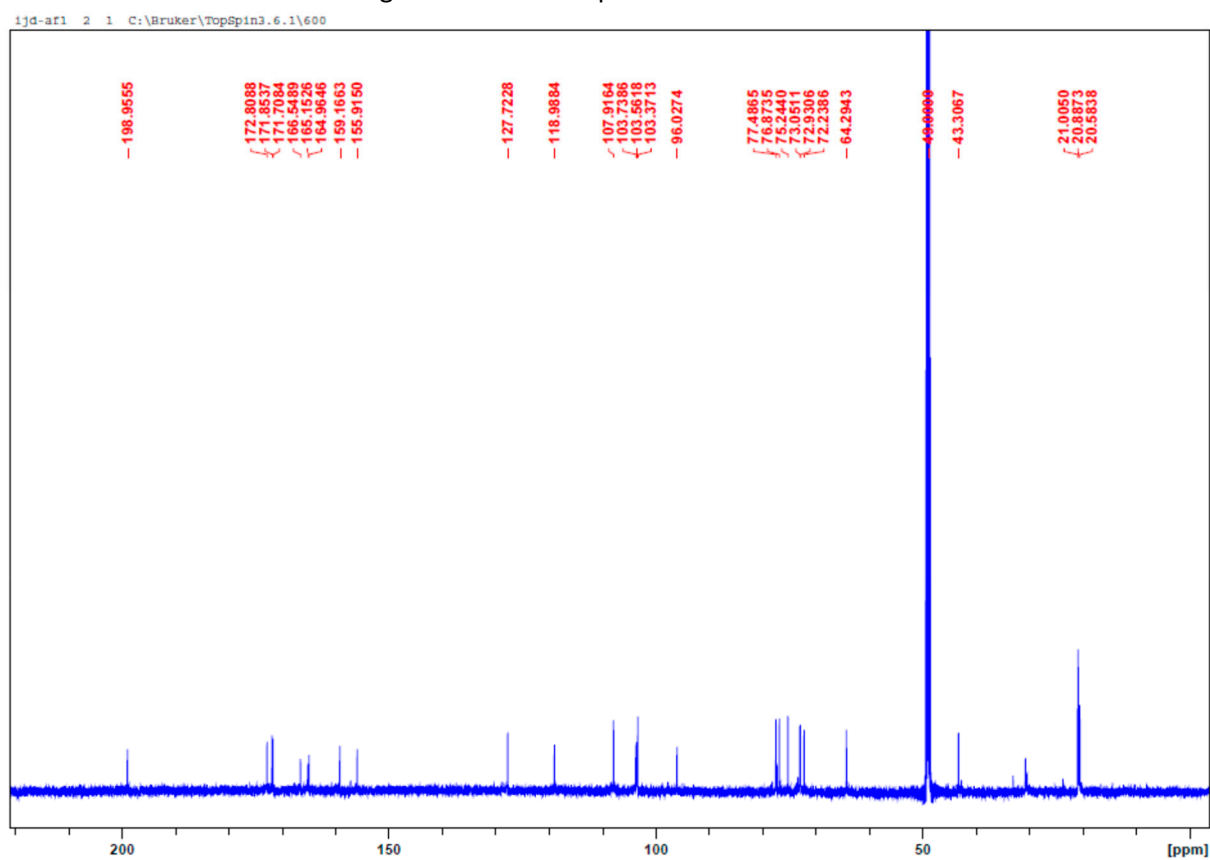

Figure S4.  $^{13}\text{C}$ -NMR spectrum of tenelloside

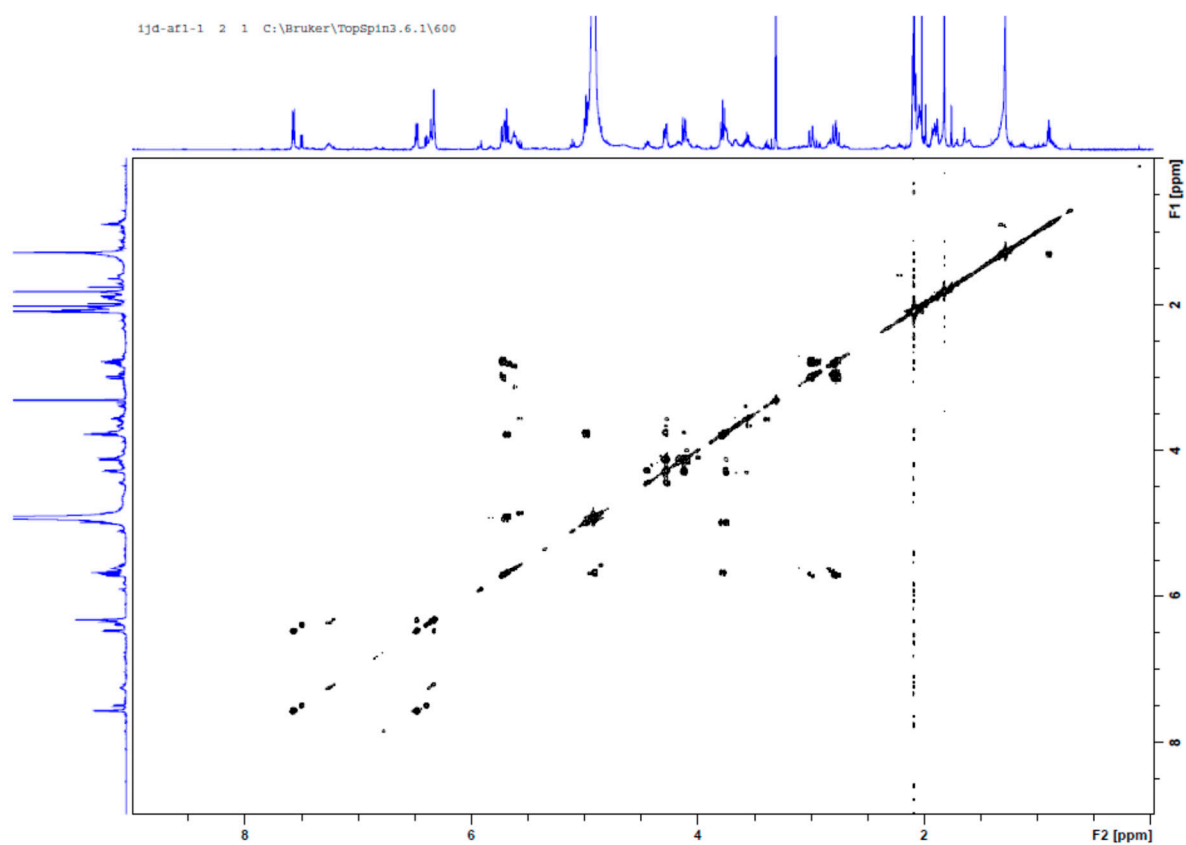

Figure S5. COSY of tenelloside

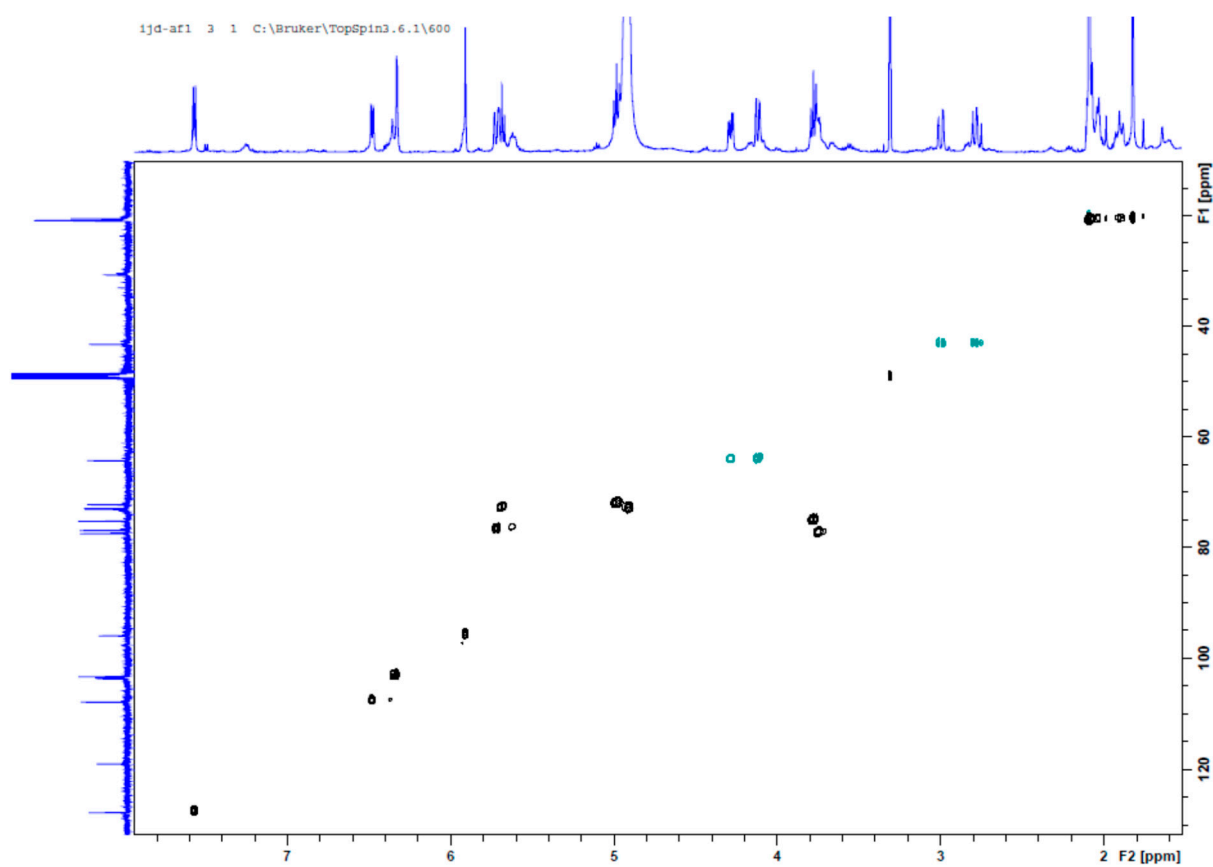

Figure S6. HSQC of tenelloside

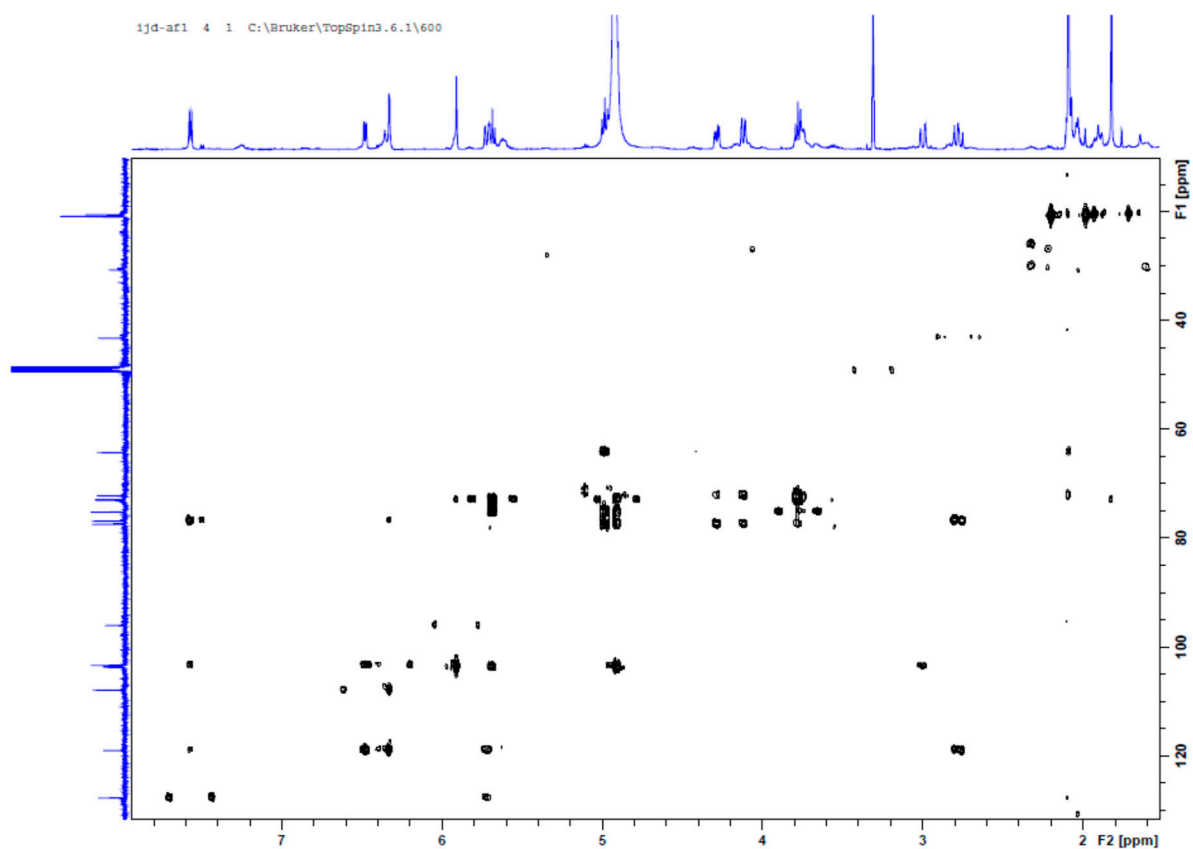

Figure S7. HMBC (part 1) of tenelloside

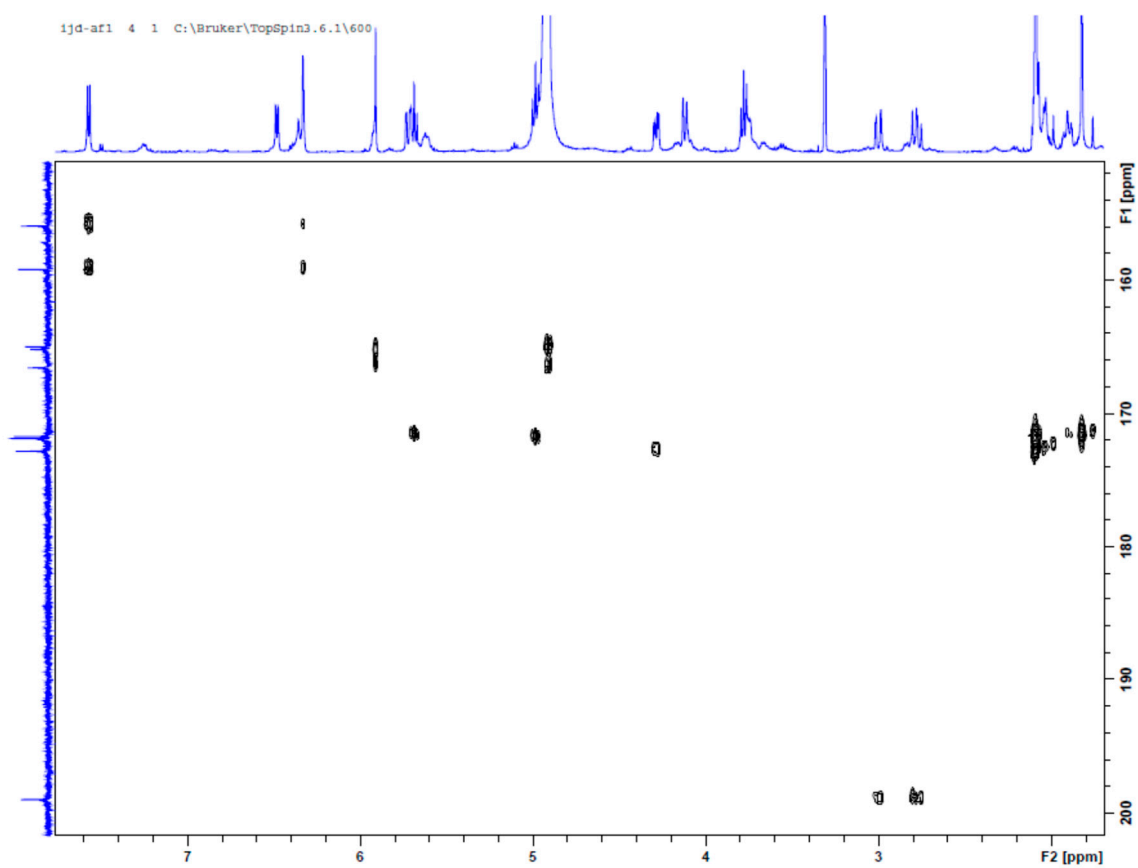

Figure S8. HMBC (part 2) of tenelloside

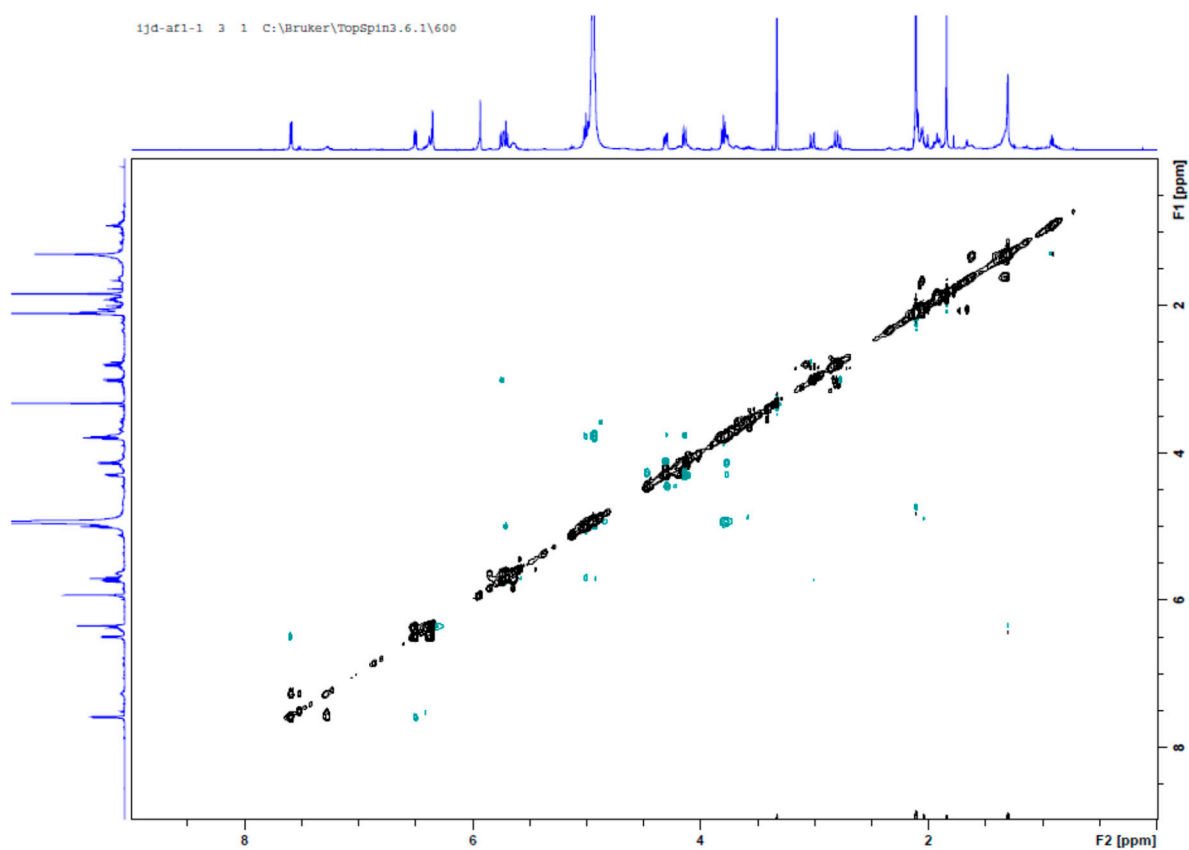

Figure S9. ROESY of tenelloside

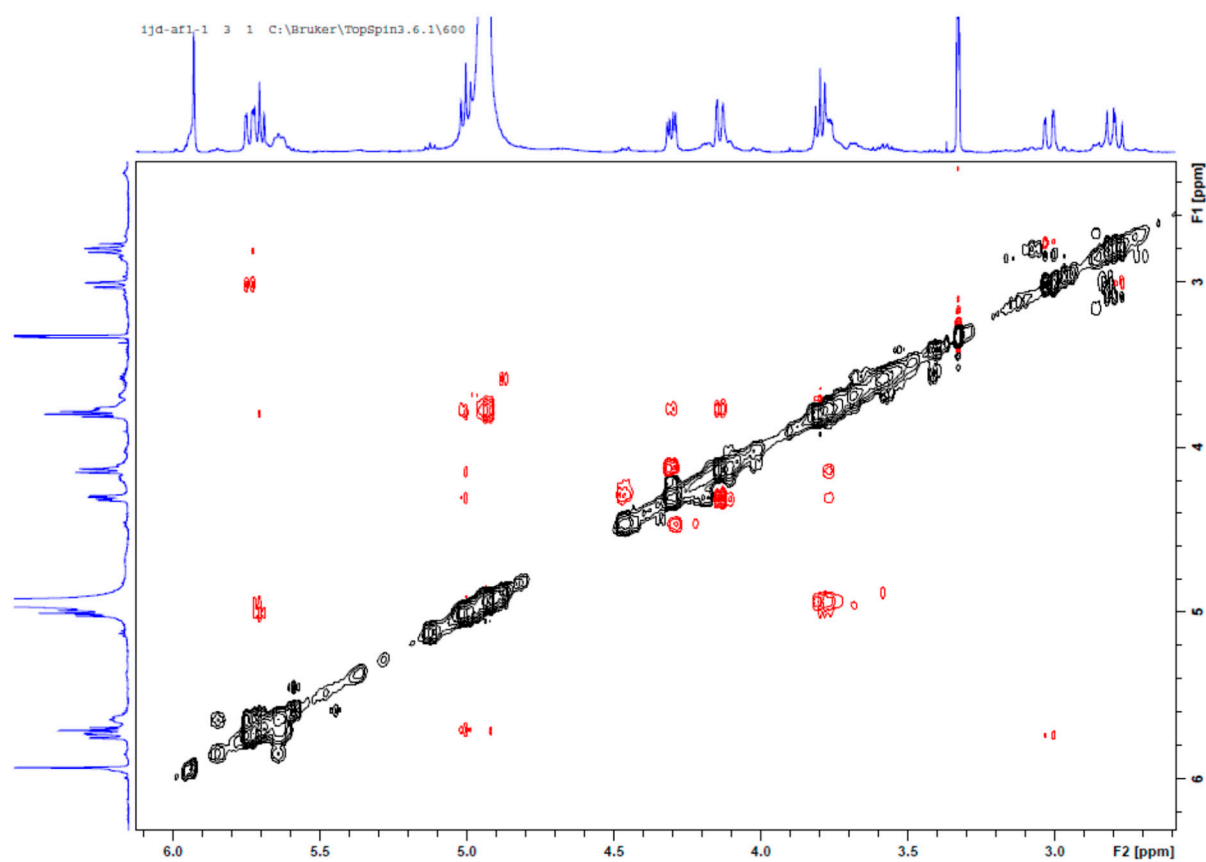

Figure S10. ROESY (zoom) of tenelloside
